# Supplementary material
Source: PubMed Central journal article supplement (PMC9189143)
Supplement: mmc2.pdf [file mmc2.pdf]

**Supplemental Table 2. COVID subject and non-COVID control subject characteristics. Related to Figure 2 and Supplemental Figure 3.**

| Case                | Age/Sex | Past Medical Hx                                                                                                 | Recent Hx                                                                                                | Days from symptom onset to death | Autopsy findings                                                                                                                                                                                                                                                                                                                      | Lung pathology: acute Diffuse Alveolar Damage/necrotizing pneumonia | Post-mortem Interval (hours) |
|---------------------|---------|-----------------------------------------------------------------------------------------------------------------|----------------------------------------------------------------------------------------------------------|----------------------------------|---------------------------------------------------------------------------------------------------------------------------------------------------------------------------------------------------------------------------------------------------------------------------------------------------------------------------------------|---------------------------------------------------------------------|------------------------------|
| COVID Case 1 (IA#1) | 73/M    | HTN, obesity                                                                                                    | Pneumonia, renal failure, pericardial effusion, arrhythmia, hospitalized for 8 days intubated for 3 days | 16 days                          | <u>General Autopsy Findings:</u> Severe pulmonary congestion with multifocal hemorrhages, pleural effusion, renal cortical pallor, fibrosis and calcification on epicardial surface<br><u>Brain Autopsy Findings:</u> Perivascular infiltrates, eosinophilic degenerating neurons, perivascular pallor in the cerebellar white matter | +/-                                                                 | 38                           |
| COVID Case 2 (IA#2) | 39/M    | Methamphetamine use disorder, cardiac and kidney disease                                                        | Cardiac, renal and respiratory failure, pulmonary emboli, hospitalized for 3 days                        | 2 days                           | <u>General Autopsy Findings:</u> Cardiac hypertrophy, pulmonary and renal infarcts<br><u>Brain Autopsy Findings:</u> Perivascular infiltrates                                                                                                                                                                                         | -/-                                                                 | 36                           |
| COVID Case 3 (NY#1) | 50/M    | DM, sciatica, back pain                                                                                         | Cough 3-5 days, found dead at home, PM swab +                                                            | days                             | <u>General Autopsy Findings:</u> HASCVD, fatty liver, nephrosclerosis<br><u>Brain Autopsy Findings:</u> Scattered acutely ischemic neurons                                                                                                                                                                                            | +/-                                                                 | 33                           |
| COVID Case 4 (NY#3) | 39/M    | Drug use disorder                                                                                               | Unknown, found dead in subway, PM swab +                                                                 | hours to days (presumed)         | <u>General Autopsy Findings:</u> Toxicology + fentanyl, heroin, alcohol, fatty liver, LVH<br><u>Brain Autopsy Findings:</u> Acute neuronal ischemia, focal gliosis of hippocampus                                                                                                                                                     | +/-                                                                 | 34                           |
| COVID Case 5 (NY#4) | 58/F    | DM, obesity, asthma, schizophrenia, had hospitalization with intubation for 1 month, discharged 1 month earlier | Unknown, found dead at home, PM swab +                                                                   | days to weeks (presumed)         | <u>General Autopsy Findings:</u> Fatty liver, diabetic kidney disease<br><u>Brain Autopsy Findings:</u> Microglial prominence and focal encephalitis (neuronophagia) of insula, basal nuclei, pons, medulla; Incidental capillary telangiectasia in pons and basal ganglia                                                            | +/-                                                                 | 29                           |
| COVID Case 6 (NY#5) | 58/F    | Obesity                                                                                                         | GI symptoms few days, found dead at home, PM swab +                                                      | days                             | <u>General Autopsy Findings:</u> LVH, nephrosclerosis<br><u>Brain Autopsy Findings:</u> Focal mineralization of thalamic neurons                                                                                                                                                                                                      | + (with fibrin thrombi)/-                                           | 30                           |
| COVID Case 7 (NY#6) | 24/M    | Flu-like symptoms 3 weeks prior                                                                                 | Sudden death, PM swab +                                                                                  | 3 weeks                          | <u>General Autopsy Findings:</u> Features of nonischemic cardiomyopathy<br><u>Brain Autopsy Findings:</u> Sparse perivascular parenchymal and leptomeningeal lymphocytes and microglial nodules in medulla                                                                                                                            | +/-                                                                 | 13                           |

|                     |      |                                                                                                                                                                                                                                                                                   |                                                                                                                       |               |                                                                                                                                                                                                                   |                                       |     |
|---------------------|------|-----------------------------------------------------------------------------------------------------------------------------------------------------------------------------------------------------------------------------------------------------------------------------------|-----------------------------------------------------------------------------------------------------------------------|---------------|-------------------------------------------------------------------------------------------------------------------------------------------------------------------------------------------------------------------|---------------------------------------|-----|
| COVID Case 8 (NY#7) | 55/M | HTN, DM, HLD, obesity, depression                                                                                                                                                                                                                                                 | Flu-like symptoms for few days, agitated delirium, subdued by force, hospitalized 6 days, hospital swab and PM swab + | days to weeks | <u>General Autopsy Findings:</u> Fatty liver disease and fibrosis, gunshot wounds to limbs<br><u>Brain Autopsy Findings:</u> Acute neuronal ischemia and microglial reaction, hippocampus, and temporal neocortex | + (with fibrin thrombi)/-             | 105 |
| COVID Case 9 (NY#8) | 54/M | Old TBI from assault 3 years prior, post-traumatic seizures, DM, in nursing home                                                                                                                                                                                                  | Recent flu-like symptoms, nursing home swab +                                                                         | Days          | <u>General Autopsy Findings:</u> Mild splenomegaly<br><u>Brain Autopsy Findings:</u> Subdural neomembranes, old contusions, slight perivascular lymphocytes in pons                                               | -/-<br>aspiration pneumonitis present | 50  |
| Control Case 1      | 54/M | HTN, CAD with prior MI and coronary stent placement, smoking (1ppd for ~30 yrs, quit 5 years prior to death), colorectal tumor resection (benign)                                                                                                                                 | N/A                                                                                                                   | N/A           | <u>Brain Autopsy Findings:</u> No significant brain pathology                                                                                                                                                     |                                       | 15  |
| Control Case 2      | 54/M | HTN, HLD, CAD with previous MI s/p pacemaker placement and CABG, CHF, atrial fibrillation, alcohol abuse, cirrhosis, end-stage kidney disease requiring dialysis, severe peripheral vascular disease complicated by lower limb gangrene requiring left lower extremity amputation | N/A                                                                                                                   | N/A           | <u>Brain Autopsy Findings:</u> Hypoxic-ischemic encephalopathy, cerebrovascular disease (arteriolosclerosis)                                                                                                      |                                       | 48  |
| Control Case 3      | 43/M | Bipolar disorder, schizophrenia, depression, PTSD, seasonal affective disorder, sickle cell trait, HLD, smoking (1ppd for ~25 years)                                                                                                                                              | N/A                                                                                                                   | N/A           | <u>Brain Autopsy Findings:</u> No significant brain pathology                                                                                                                                                     |                                       | 28  |
| Control Case 4      | 70/M | Headaches, alcohol abuse, smoking (reported "5ppd" since teens)                                                                                                                                                                                                                   | N/A                                                                                                                   | N/A           | <u>Brain Autopsy Findings:</u> Cerebrovascular disease (arteriolosclerosis), age-related tauopathy                                                                                                                |                                       | N/A |
| Control Case 5      | 65/M | HTN, asthma, insulin-dependent diabetes, c/2ine use, 1/2ppd smoker, unexplained mental decline and gait instability                                                                                                                                                               | N/A                                                                                                                   | N/A           | <u>Brain Autopsy Findings:</u> Cerebrovascular disease (atherosclerosis, arteriolosclerosis), Lewy body disease/Parkinson's                                                                                       |                                       | 38  |
| Control Case 6      | 65/M | Ischemic cardiomyopathy, multi-vessel coronary artery disease, cardiac arrhythmia, HTN, HLD, DM2                                                                                                                                                                                  | Cardiac arrest in setting of ventricular tachycardia                                                                  | N/A           | <u>Brain Autopsy Findings:</u> Atherosclerosis, hypertensive vasculopathy                                                                                                                                         |                                       | 72  |

|                |      |                                                                                                                                      |                                                                        |     |                                                               |    |
|----------------|------|--------------------------------------------------------------------------------------------------------------------------------------|------------------------------------------------------------------------|-----|---------------------------------------------------------------|----|
| Control Case 7 | 72/M | End-stage COPD/emphysema status post bilateral lung transplant, alcohol-related non-ischemic cardiomyopathy, HTN, cardiac arrhythmia | recent bilateral lung transplant complicated by bilateral hemothoraces | N/A | <u>Brain Autopsy Findings:</u> No significant brain pathology | 72 |
| Control Case 8 | 84/M | Obesity, pulmonary hypertension, COPD, 60 pack-year smoking history obstructive sleep apnea, gout, HTN, DM2, BPH, CKD                | Recent fall with leg injury                                            | N/A | <u>Brain Autopsy Findings:</u> Moderate atherosclerosis       | 39 |
| Control Case 9 | 64/M | Obesity, obstructive sleep apnea, 20 pack-year smoking history, BPH, sciatica, left knee arthroplasty                                | Sudden death                                                           | N/A | <u>Brain Autopsy Findings:</u> Mild hypertensive vasculopathy | 50 |

**Supplemental Table 2. COVID subject and non-COVID control subject characteristics.** All COVID case deaths occurred between March and July 2020, at a time when the original strain of SARS-CoV-2 was predominant. N/A, not available.

Abbreviations: PMI, postmortem interval; CMV, cytomegalovirus; COPD, chronic obstructive pulmonary disease; DAD, diffuse alveolar damage, HTN, hypertension; CAD, coronary artery disease; MI, myocardial infarction; HLD, hyperlipidemia; CABG, coronary artery bypass grafting; CHF, congestive heart failure; DM2, diabetes mellitus type II, PTSD, post-traumatic stress disorder; BPH, benign prostatic hypertrophy, CKD, chronic kidney disease.

Related to Figure 2 and Supplemental Figure 3.
